# Supplementary material for: Revealing the binding mode between respiratory syncytial virus fusion protein and benzimidazole-based inhibitors
Source: Royal Society of Chemistry journal article supplement (doi:10.1039/c5mb00036j), 2015-04-08
Supplement: c5mb00036j2.pdf [file c5mb00036j2.pdf]

Table S1. Structures and bioactivities

| ID    | Structure                                                                           | ACS Registry Number | pEC50  | CoMFA  | CoMSIA |
|-------|-------------------------------------------------------------------------------------|---------------------|--------|--------|--------|
| G1-1  | 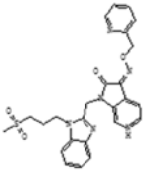   | 1187776-07-3        | 7.5376 | 7.6866 | 7.5514 |
| G1-2  |    | 1187776-06-2        | 7.2628 | 7.6737 | 7.2973 |
| G1-3  |   | 1187776-05-1        | 7.2083 | 7.3624 | 7.4020 |
| G1-4  |  | 1187776-04-0        | 6.9747 | 7.4232 | 7.0470 |
| G1-5* |  | 1187776-03-9        | 6.5452 | 6.5680 | 6.2370 |
| G1-6* |  | 1187776-02-8        | 6.0467 | 6.3659 | 6.5209 |
| G1-7  |  | 1187776-01-7        | 6.6383 | 6.8704 | 6.6906 |

|        |                                                                                     |              |        |        |        |
|--------|-------------------------------------------------------------------------------------|--------------|--------|--------|--------|
| G1-8   | 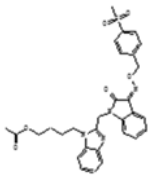   | 1187775-94-5 | 8.3010 | 8.2893 | 8.1056 |
| G1-9   |    | 1187775-93-4 | 8.0458 | 8.1423 | 7.9182 |
| G1-10  |    | 1187775-91-2 | 6.1518 | 6.1437 | 6.7625 |
| G1-11* |   | 1187775-90-1 | 7.7212 | 7.6439 | 6.8944 |
| G1-12* |  | 1187775-89-8 | 7.3372 | 7.4745 | 7.8387 |
| G1-13* |  | 1187775-88-7 | 6.5302 | 6.5031 | 6.4473 |
| G1-14  |  | 1187775-87-6 | 6.8508 | 6.7963 | 6.7634 |

|        |                                                                                     |              |        |        |        |
|--------|-------------------------------------------------------------------------------------|--------------|--------|--------|--------|
| G1-15  | 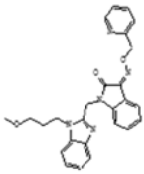   | 1187775-86-5 | 6.6234 | 6.4887 | 6.4580 |
| G1-16  |    | 1187775-85-4 | 6.5376 | 6.6688 | 6.4382 |
| G1-17* |    | 1187775-84-3 | 6.1662 | 6.1603 | 6.0602 |
| G1-18  |   | 1187775-83-2 | 6.6198 | 6.7638 | 6.5285 |
| G1-19  |  | 1187775-82-1 | 6.4318 | 6.3484 | 6.1742 |
| G1-20  |  | 1187775-81-0 | 7.5850 | 7.6263 | 7.6951 |
| G1-21  |  | 1187775-80-9 | 7.2076 | 7.1145 | 7.3191 |

|        |                                                                                     |              |        |        |        |
|--------|-------------------------------------------------------------------------------------|--------------|--------|--------|--------|
| G1-22  | 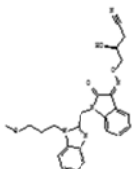   | 1187775-79-6 | 7.1871 | 7.2868 | 7.2314 |
| G1-23  |    | 1187775-78-5 | 7.1024 | 6.7242 | 6.8044 |
| G1-24  |    | 1187775-77-4 | 7.1938 | 7.0635 | 6.9119 |
| G1-25* |   | 1187775-76-3 | 6.7167 | 6.7016 | 6.7091 |
| G1-26  |  | 1187775-75-2 | 6.5850 | 6.6339 | 6.8360 |
| G1-27  |  | 1187775-74-1 | 6.3686 | 6.5914 | 6.7963 |
| G1-28  |  | 1187775-73-0 | 6.7258 | 6.7366 | 6.6168 |

|        |                                                                                     |              |        |        |        |
|--------|-------------------------------------------------------------------------------------|--------------|--------|--------|--------|
| G1-29  | 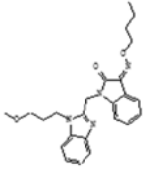   | 1187775-71-8 | 6.5834 | 6.9735 | 6.7778 |
| G1-30  |    | 1187775-70-7 | 6.9031 | 6.8960 | 6.8587 |
| G1-31  |    | 1187775-69-4 | 6.8327 | 7.0454 | 7.0583 |
| G1-32  |   | 1187775-68-3 | 6.4157 | 6.5803 | 5.9417 |
| G1-33  |  | 1187775-67-2 | 6.8182 | 7.1620 | 6.4352 |
| G1-34  |  | 1187775-66-1 | 6.1858 | 6.5901 | 6.5309 |
| G1-36* |  | 1187775-64-9 | 6.6091 | 7.0244 | 6.5386 |

|        |                                                                                                                                                                                                                        |              |        |        |        |
|--------|------------------------------------------------------------------------------------------------------------------------------------------------------------------------------------------------------------------------|--------------|--------|--------|--------|
| G1-37* | A complex organic molecule featuring a central benzimidazole ring system. It has a propyl group at the 2-position, a 2-(propylamino)ethyl group at the 5-position, and a 2-(propylamino)ethyl group at the 7-position. | 1187775-63-8 | 7.0177 | 6.8227 | 6.5359 |
| G1-38  | A complex organic molecule featuring a central benzimidazole ring system. It has a propyl group at the 2-position, a 2-(propylamino)ethyl group at the 5-position, and a 2-(propylamino)ethyl group at the 7-position. | 1187775-62-7 | 6.0292 | 6.2816 | 6.4571 |
| G1-39  | A complex organic molecule featuring a central benzimidazole ring system. It has a propyl group at the 2-position, a 2-(propylamino)ethyl group at the 5-position, and a 2-(propylamino)ethyl group at the 7-position. | 1187775-61-6 | 6.5901 | 6.4169 | 6.6358 |
| G1-40* | A complex organic molecule featuring a central benzimidazole ring system. It has a propyl group at the 2-position, a 2-(propylamino)ethyl group at the 5-position, and a 2-(propylamino)ethyl group at the 7-position. | 1187775-60-5 | 7.1487 | 7.4811 | 7.1206 |
| G1-41  | A complex organic molecule featuring a central benzimidazole ring system. It has a propyl group at the 2-position, a 2-(propylamino)ethyl group at the 5-position, and a 2-(propylamino)ethyl group at the 7-position. | 1187775-59-2 | 7.2291 | 6.7645 | 6.8833 |
| G1-42  | A complex organic molecule featuring a central benzimidazole ring system. It has a propyl group at the 2-position, a 2-(propylamino)ethyl group at the 5-position, and a 2-(propylamino)ethyl group at the 7-position. | 1187775-58-1 | 7.5229 | 7.3559 | 7.2004 |
| G1-43  | A complex organic molecule featuring a central benzimidazole ring system. It has a propyl group at the 2-position, a 2-(propylamino)ethyl group at the 5-position, and a 2-(propylamino)ethyl group at the 7-position. | 1187775-57-0 | 7.5229 | 7.7732 | 7.2677 |

|        |                                                                                                                                                                                                                                                                                                                                                          |              |        |        |        |
|--------|----------------------------------------------------------------------------------------------------------------------------------------------------------------------------------------------------------------------------------------------------------------------------------------------------------------------------------------------------------|--------------|--------|--------|--------|
| G1-44* | <p>The chemical structure of G1-44* features a central benzimidazole ring system. One nitrogen atom is substituted with a 3-hydroxypropyl group (-CH<sub>2</sub>-CH<sub>2</sub>-CH<sub>2</sub>-OH). The other nitrogen atom is substituted with a 2-(2-methylphenyl)ethyl group. The benzimidazole ring is fused to a benzene ring.</p>                  | 1187775-56-9 | 8.0000 | 7.5606 | 7.5466 |
| G2-45  | <p>The chemical structure of G2-45 features a central benzimidazole ring system. One nitrogen atom is substituted with a 2-(2-methylphenyl)ethyl group. The other nitrogen atom is substituted with a 2-(2-aminoethyl)ethyl group (-CH<sub>2</sub>-CH<sub>2</sub>-CH<sub>2</sub>-NH<sub>2</sub>). The benzimidazole ring is fused to a benzene ring.</p> | 950668-30-1  | 5.4318 | 5.1612 | 5.8135 |
| G2-46  | <p>The chemical structure of G2-46 features a central benzimidazole ring system. One nitrogen atom is substituted with a 2-(2-methylphenyl)ethyl group. The other nitrogen atom is substituted with a 2-(2-hydroxyethyl)ethyl group (-CH<sub>2</sub>-CH<sub>2</sub>-CH<sub>2</sub>-OH). The benzimidazole ring is fused to a benzene ring.</p>           | 950668-29-8  | 3.6091 | 3.4015 | 3.4902 |
| G2-47* | <p>The chemical structure of G2-47* features a central benzimidazole ring system. One nitrogen atom is substituted with a 2-(2-methylphenyl)ethyl group. The other nitrogen atom is substituted with a 2-(2-aminoethyl)ethyl group. The benzimidazole ring is fused to a benzene ring.</p>                                                               | 950668-28-7  | 3.6383 | 3.5819 | 3.8798 |
| G2-48  | <p>The chemical structure of G2-48 features a central benzimidazole ring system. One nitrogen atom is substituted with a 2-(2-methylphenyl)ethyl group. The other nitrogen atom is substituted with a 2-(2-aminoethyl)ethyl group. The benzimidazole ring is fused to a benzene ring.</p>                                                                | 950668-27-6  | 3.7167 | 3.7811 | 3.4434 |
| G2-49  | <p>The chemical structure of G2-49 features a central benzimidazole ring system. One nitrogen atom is substituted with a 2-(2-methylphenyl)ethyl group. The other nitrogen atom is substituted with a 2-(2-aminoethyl)ethyl group. The benzimidazole ring is fused to a benzene ring.</p>                                                                | 950668-26-5  | 3.9101 | 4.1585 | 3.7609 |
| G2-50  | <p>The chemical structure of G2-50 features a central benzimidazole ring system. One nitrogen atom is substituted with a 2-(2-methylphenyl)ethyl group. The other nitrogen atom is substituted with a 2-(2-aminoethyl)ethyl group. The benzimidazole ring is fused to a benzene ring.</p>                                                                | 950668-25-4  | 3.6234 | 3.5870 | 3.7399 |

|        |                                                                                                                                                                                                                   |             |        |        |        |
|--------|-------------------------------------------------------------------------------------------------------------------------------------------------------------------------------------------------------------------|-------------|--------|--------|--------|
| G2-51* | A complex organic molecule featuring a central benzimidazole ring system. It has a 2-ethylbutyl group at position 2, a 2,4-dimethylphenyl group at position 1, and a 4-cyanophenyl group at position 5.           | 950668-24-3 | 7.3565 | 7.1395 | 7.7145 |
| G2-52* | A complex organic molecule featuring a central benzimidazole ring system. It has a 2-ethylbutyl group at position 2, a 2,4-dimethylphenyl group at position 1, and a 4-(dimethylamino)phenyl group at position 5. | 950668-23-2 | 3.7375 | 3.7192 | 3.7270 |
| G2-53  | A complex organic molecule featuring a central benzimidazole ring system. It has a 2-ethylbutyl group at position 2, a 2,4-dimethylphenyl group at position 1, and a 4-(2-oxoethyl)phenyl group at position 5.    | 950668-22-1 | 3.6383 | 3.6529 | 3.6300 |
| G2-54  | A complex organic molecule featuring a central benzimidazole ring system. It has a 2-ethylbutyl group at position 2, a 2,4-dimethylphenyl group at position 1, and a 4-(2-thiazolyl)phenyl group at position 5.   | 950668-20-9 | 3.6478 | 3.6794 | 3.5271 |
| G2-55  | A complex organic molecule featuring a central benzimidazole ring system. It has a 2-ethylbutyl group at position 2, a 2,4-dimethylphenyl group at position 1, and a 4-(2-oxoethyl)phenyl group at position 5.    | 950668-19-6 | 3.5784 | 3.4963 | 3.6669 |
| G2-56  | A complex organic molecule featuring a central benzimidazole ring system. It has a 2-ethylbutyl group at position 2, a 2,4-dimethylphenyl group at position 1, and a 4-(2-thiazolyl)phenyl group at position 5.   | 950668-18-5 | 3.6216 | 3.8179 | 4.1753 |
| G3-57  | A complex organic molecule featuring a central benzimidazole ring system. It has a 2-ethylbutyl group at position 2, a 2,4-dimethylphenyl group at position 1, and a 4-(2-oxoethyl)phenyl group at position 5.    | 948864-12-8 | 6.5800 | 6.6549 | 6.3910 |



|        |                                                                                                                                                                                                                         |             |        |        |        |
|--------|-------------------------------------------------------------------------------------------------------------------------------------------------------------------------------------------------------------------------|-------------|--------|--------|--------|
| G3-59* | A complex polycyclic molecule with a central benzene ring fused to a five-membered ring containing a nitrogen atom. It has a propyl chain with a terminal hydroxyl group and a side chain with a terminal epoxide ring. | 948864-09-3 | 7.2596 | 7.3086 | 7.1315 |
| G3-60* | A complex polycyclic molecule with a central benzene ring fused to a five-membered ring containing a nitrogen atom. It has a propyl chain with a terminal hydroxyl group and a side chain with a terminal epoxide ring. | 948864-08-2 | 5.8729 | 6.0247 | 6.1544 |
| G3-61  | A complex polycyclic molecule with a central benzene ring fused to a five-membered ring containing a nitrogen atom. It has a propyl chain with a terminal hydroxyl group and a side chain with a terminal epoxide ring. | 948864-07-1 | 7.3372 | 7.2162 | 7.6456 |
| G3-62* | A complex polycyclic molecule with a central benzene ring fused to a five-membered ring containing a nitrogen atom. It has a propyl chain with a terminal hydroxyl group and a side chain with a terminal epoxide ring. | 948864-06-0 | 6.2596 | 6.5877 | 6.3927 |
| G3-63  | A complex polycyclic molecule with a central benzene ring fused to a five-membered ring containing a nitrogen atom. It has a propyl chain with a terminal hydroxyl group and a side chain with a terminal epoxide ring. | 948864-05-9 | 6.7696 | 6.8355 | 6.4081 |
| G3-64  | A complex polycyclic molecule with a central benzene ring fused to a five-membered ring containing a nitrogen atom. It has a propyl chain with a terminal hydroxyl group and a side chain with a terminal epoxide ring. | 948864-04-8 | 8.0458 | 8.2855 | 7.5388 |
| G3-65  | A complex polycyclic molecule with a central benzene ring fused to a five-membered ring containing a nitrogen atom. It has a propyl chain with a terminal hydroxyl group and a side chain with a terminal epoxide ring. | 948864-03-7 | 6.5850 | 6.7511 | 6.8913 |

|        |                                                                                                                                                                                                                                                      |             |        |        |        |
|--------|------------------------------------------------------------------------------------------------------------------------------------------------------------------------------------------------------------------------------------------------------|-------------|--------|--------|--------|
| G3-66* | A complex polycyclic molecule featuring a central benzene ring fused to a five-membered ring containing a nitrogen atom. This is further fused to a six-membered ring with a carbonyl group. A side chain includes a phenyl ring and a propyl group. | 948864-02-6 | 5.7430 | 5.4755 | 5.9697 |
| G3-67* | A complex polycyclic molecule similar to G3-66*, but with a different side chain configuration, including a phenyl ring and a propyl group.                                                                                                          | 948864-01-5 | 5.2808 | 5.6159 | 5.9190 |
| G3-68* | A complex polycyclic molecule with a central benzene ring fused to a five-membered ring with a nitrogen atom, and a six-membered ring with a carbonyl group. It has a side chain with a phenyl ring, a propyl group, and a methyl group.             | 948864-00-4 | 6.5406 | 6.8086 | 6.4386 |
| G3-70  | A complex polycyclic molecule with a central benzene ring fused to a five-membered ring with a nitrogen atom, and a six-membered ring with a carbonyl group. It has a side chain with a phenyl ring and a propyl group.                              | 948863-98-7 | 7.0862 | 6.6725 | 7.0044 |
| G3-71  | A complex polycyclic molecule with a central benzene ring fused to a five-membered ring with a nitrogen atom, and a six-membered ring with a carbonyl group. It has a side chain with a phenyl ring and a propyl group.                              | 948863-97-6 | 7.4437 | 7.3471 | 7.3730 |
| G3-72* | A complex polycyclic molecule with a central benzene ring fused to a five-membered ring with a nitrogen atom, and a six-membered ring with a carbonyl group. It has a side chain with a phenyl ring and a propyl group.                              | 948863-96-5 | 6.3410 | 6.0634 | 6.8082 |
| G3-73* | A complex polycyclic molecule with a central benzene ring fused to a five-membered ring with a nitrogen atom, and a six-membered ring with a carbonyl group. It has a side chain with a phenyl ring and a propyl group.                              | 948863-95-4 | 5.9559 | 6.3684 | 6.5975 |

|        |                                                                                     |             |        |        |        |
|--------|-------------------------------------------------------------------------------------|-------------|--------|--------|--------|
| G3-75  | 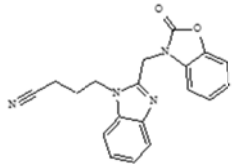   | 948863-93-2 | 5.6003 | 5.6240 | 6.1504 |
| G3-76  |    | 792184-48-6 | 8.0458 | 8.0646 | 7.9461 |
| G3-77  |    | 791583-23-8 | 8.0969 | 8.2849 | 7.9852 |
| G3-78* |   | 785773-56-0 | 7.7447 | 7.5549 | 7.7862 |
| G3-79  |  | 778572-60-4 | 7.6778 | 7.6503 | 7.9842 |
| G3-80  |  | 775576-32-4 | 8.5229 | 8.5926 | 8.2905 |
| G3-81  |  | 765267-71-8 | 8.0969 | 8.1651 | 8.4326 |

|        |  |             |        |        |        |
|--------|--|-------------|--------|--------|--------|
| G3-82  |  | 754182-82-6 | 8.0458 | 8.0235 | 7.9132 |
| G3-83  |  | 752980-90-8 | 7.9586 | 7.8149 | 7.9096 |
| G2-84* |  | 751477-81-3 | 6.0862 | 6.2409 | 6.1049 |
| G3-85  |  | 749845-87-2 | 6.1035 | 6.4728 | 6.6149 |
| G2-86  |  | 748766-54-3 | 6.1457 | 6.2680 | 6.1463 |
| G1-87  |  | 735259-03-7 | 7.7959 | 7.8028 | 7.6718 |
| G2-88  |  | 720662-44-2 | 3.6716 | 3.5154 | 3.8490 |

|        |                                                                                                                                                                                                                                                                       |             |        |        |        |
|--------|-----------------------------------------------------------------------------------------------------------------------------------------------------------------------------------------------------------------------------------------------------------------------|-------------|--------|--------|--------|
| G2-89* | A complex polycyclic molecule featuring a central benzimidazole core. It has a 2-cyanoethyl group at position 2, an isobutyl group at position 3, and a 2-isobutyl-1H-benzimidazol-5-ylmethyl group at position 4. The benzimidazole ring is fused to a benzene ring. | 554458-79-6 | 3.6308 | 3.4332 | 3.9202 |
| G2-90  | A complex polycyclic molecule similar to G2-89*, but with a 2-isobutyl-1H-benzimidazol-5-ylmethyl group at position 2 and a 2-cyanoethyl group at position 3.                                                                                                         | 554458-75-2 | 3.6180 | 3.8595 | 3.8214 |
| G2-91  | A complex polycyclic molecule similar to G2-89*, but with a 2-isobutyl-1H-benzimidazol-5-ylmethyl group at position 2 and a 2-methoxyethyl group at position 3.                                                                                                       | 554458-74-1 | 5.1249 | 4.9855 | 5.2147 |
| G2-92  | A complex polycyclic molecule similar to G2-89*, but with a 2-isobutyl-1H-benzimidazol-5-ylmethyl group at position 2 and a 2-hydroxyethyl group at position 3.                                                                                                       | 554458-70-7 | 6.0862 | 6.1719 | 6.2187 |
| G2-93* | A complex polycyclic molecule similar to G2-89*, but with a 2-isobutyl-1H-benzimidazol-5-ylmethyl group at position 2 and a 2-methoxyethyl group at position 3. It also has a 2-methoxyethyl group at position 4.                                                     | 554458-69-4 | 3.6383 | 3.8557 | 4.3869 |
| G2-95  | A complex polycyclic molecule similar to G2-89*, but with a 2-isobutyl-1H-benzimidazol-5-ylmethyl group at position 2 and a 2-isobutyl-1H-benzimidazol-5-ylmethyl group at position 3.                                                                                | 554458-48-9 | 4.6655 | 5.0741 | 4.6760 |
| G2-96  | A complex polycyclic molecule similar to G2-89*, but with a 2-isobutyl-1H-benzimidazol-5-ylmethyl group at position 2 and a 2-isobutyl-1H-benzimidazol-5-ylmethyl group at position 3. It also has a 2-hydroxyethyl group at position 4.                              | 554458-47-8 | 6.9547 | 6.8241 | 6.8359 |

|         |                                                                                                                                                                                                                                                                                                                                                                           |             |        |        |        |
|---------|---------------------------------------------------------------------------------------------------------------------------------------------------------------------------------------------------------------------------------------------------------------------------------------------------------------------------------------------------------------------------|-------------|--------|--------|--------|
| G2-100* | A complex organic molecule featuring a central benzimidazole ring system. It has a 2,4,6-trimethylphenyl group attached to the benzimidazole nitrogen, a 2-ethylbutyl group attached to the imidazole nitrogen, and a 4-(2,4,6-trimethylphenyl)phenyl group attached to the imidazole ring. A 2-aminoethyl group is attached to the benzimidazole ring at the 5-position. | 554457-86-2 | 6.1586 | 5.7461 | 6.0448 |
| G2-101  | A complex organic molecule similar to G2-100*, but with a 2-aminoethyl group attached to the benzimidazole ring at the 6-position.                                                                                                                                                                                                                                        | 554457-64-6 | 5.1481 | 5.0281 | 5.3778 |
| G2-102  | A complex organic molecule similar to G2-100*, but with a 2-aminoethyl group attached to the benzimidazole ring at the 7-position.                                                                                                                                                                                                                                        | 554457-62-4 | 7.2441 | 7.4337 | 7.2810 |
| G2-103* | A complex organic molecule similar to G2-100*, but with a 2-aminoethyl group attached to the benzimidazole ring at the 8-position.                                                                                                                                                                                                                                        | 554457-61-3 | 3.7399 | 3.6330 | 3.2739 |
| G2-104  | A complex organic molecule similar to G2-100*, but with a 2-aminoethyl group attached to the benzimidazole ring at the 9-position.                                                                                                                                                                                                                                        | 554457-59-9 | 6.8729 | 6.9305 | 7.0508 |
| G2-105  | A complex organic molecule similar to G2-100*, but with a 2-aminoethyl group attached to the benzimidazole ring at the 10-position.                                                                                                                                                                                                                                       | 554457-54-4 | 7.0223 | 7.1461 | 6.9213 |
| G2-106  | A complex organic molecule similar to G2-100*, but with a 2-aminoethyl group attached to the benzimidazole ring at the 11-position.                                                                                                                                                                                                                                       | 554457-49-7 | 6.1599 | 6.6069 | 6.6736 |

|         |                                                                                     |             |        |        |        |
|---------|-------------------------------------------------------------------------------------|-------------|--------|--------|--------|
| G2-107  | 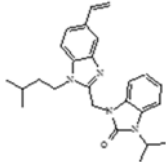   | 554457-48-6 | 6.2007 | 6.3430 | 6.7126 |
| G2-108  |    | 554457-47-5 | 6.9031 | 6.9343 | 7.0865 |
| G2-109  |    | 554457-45-3 | 7.7447 | 7.7088 | 7.4076 |
| G2-110* |   | 554457-30-6 | 7.5086 | 7.5610 | 7.7921 |
| G2-111  |  | 554457-29-3 | 8.0458 | 7.9796 | 8.1423 |
| G2-112  |  | 554457-28-2 | 7.7959 | 7.9648 | 7.5246 |
| G2-113* |  | 554457-22-6 | 8.3979 | 8.0013 | 8.3632 |

|         |  |             |        |        |        |
|---------|--|-------------|--------|--------|--------|
| G2-114  |  | 554457-21-5 | 8.3010 | 8.0123 | 8.4416 |
| G2-115* |  | 554457-20-4 | 7.3279 | 7.1798 | 7.5286 |
| G2-116  |  | 554457-19-1 | 5.3635 | 5.4791 | 5.4485 |
| G2-117  |  | 554457-18-0 | 6.9318 | 6.9451 | 6.6343 |
| G2-118  |  | 554457-17-9 | 6.4401 | 6.2259 | 6.6273 |
| G2-119* |  | 554457-16-8 | 7.2441 | 7.7042 | 7.7880 |
| G2-120  |  | 554457-14-6 | 6.7799 | 6.5717 | 6.7258 |



|         |  |             |        |        |        |
|---------|--|-------------|--------|--------|--------|
| G2-121  |  | 554457-13-5 | 4.6055 | 4.5352 | 4.4994 |
| G2-122  |  | 554457-12-4 | 7.3010 | 7.0466 | 7.2119 |
| G2-123  |  | 554457-11-3 | 3.6234 | 3.7764 | 3.5886 |
| G2-124* |  | 554457-10-2 | 6.1397 | 6.1344 | 6.6869 |
| G2-125  |  | 554457-09-9 | 6.2000 | 5.8298 | 6.3516 |
| G2-126  |  | 554457-08-8 | 8.6990 | 8.7043 | 8.3397 |
| G2-127  |  | 554457-07-7 | 6.3224 | 6.1842 | 6.4143 |

|         |                                                                                     |             |        |        |        |
|---------|-------------------------------------------------------------------------------------|-------------|--------|--------|--------|
| G2-128  | 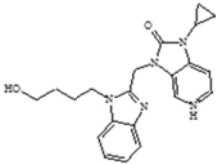   | 543700-68-1 | 7.6778 | 7.6678 | 7.9162 |
| G3-129  |    | 443987-52-8 | 7.3565 | 7.0565 | 7.4366 |
| G3-130  |    | 443987-46-0 | 6.0448 | 6.1097 | 6.1749 |
| G3-131  |   | 443987-44-8 | 6.6757 | 6.8096 | 7.0038 |
| G3-132  |  | 443987-43-7 | 6.1035 | 6.1294 | 6.0340 |
| G3-133* |  | 443987-42-6 | 5.6373 | 5.4474 | 5.9468 |
| G3-134  |  | 443987-41-5 | 6.8327 | 6.9162 | 6.7686 |

|         |                                                                                                                                                                                        |             |        |        |        |
|---------|----------------------------------------------------------------------------------------------------------------------------------------------------------------------------------------|-------------|--------|--------|--------|
| G3-135* | A complex polycyclic molecule featuring a central benzimidazole ring system. It is substituted with a phenyl group, a propyl chain, and a 1,2,4-triazole ring fused to a benzene ring. | 443987-40-4 | 4.5864 | 4.5669 | 4.4791 |
| G3-136  | A complex polycyclic molecule similar to G3-135*, but with a different substitution pattern on the benzimidazole ring, including a propyl chain and a 1,2,4-triazole ring.             | 443987-32-4 | 5.1152 | 5.3793 | 4.9215 |
| G3-138  | A complex polycyclic molecule similar to G3-135*, but with a different substitution pattern on the benzimidazole ring, including a propyl chain and a 1,2,4-triazole ring.             | 443987-28-8 | 6.6402 | 6.3486 | 6.7532 |
| G3-139  | A complex polycyclic molecule similar to G3-135*, but with a different substitution pattern on the benzimidazole ring, including a propyl chain and a 1,2,4-triazole ring.             | 443987-27-7 | 5.9905 | 5.8269 | 6.5165 |
| G3-140  | A complex polycyclic molecule similar to G3-135*, but with a different substitution pattern on the benzimidazole ring, including a propyl chain and a 1,2,4-triazole ring.             | 443987-26-6 | 5.8729 | 6.1659 | 5.8642 |
| G3-141* | A complex polycyclic molecule similar to G3-135*, but with a different substitution pattern on the benzimidazole ring, including a propyl chain and a 1,2,4-triazole ring.             | 443987-25-5 | 6.5622 | 6.7989 | 6.9010 |
| G3-142  | A complex polycyclic molecule similar to G3-135*, but with a different substitution pattern on the benzimidazole ring, including a propyl chain and a 1,2,4-triazole ring.             | 443987-21-1 | 7.7212 | 7.7220 | 7.5760 |

|        |                                                                                     |             |        |        |        |
|--------|-------------------------------------------------------------------------------------|-------------|--------|--------|--------|
| G3-143 | 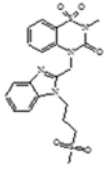   | 443987-20-0 | 5.2418 | 5.4513 | 4.9915 |
| G3-144 |    | 443987-19-7 | 7.4318 | 7.2872 | 7.1334 |
| G3-145 |    | 443987-18-6 | 6.3645 | 6.6924 | 6.5601 |
| G3-146 |   | 443987-09-5 | 6.7670 | 6.3699 | 6.7636 |
| G3-147 |  | 443987-08-4 | 7.6021 | 7.5968 | 7.5269 |
| G3-148 |  | 443987-07-3 | 7.3010 | 7.5059 | 7.3239 |
| G3-149 |  | 443987-06-2 | 8.0458 | 7.9815 | 7.3401 |

|         |                                                                                                                                                                                                                                                                                                   |             |        |        |        |
|---------|---------------------------------------------------------------------------------------------------------------------------------------------------------------------------------------------------------------------------------------------------------------------------------------------------|-------------|--------|--------|--------|
| G3-150* | A complex molecule featuring a central benzimidazole ring system. One nitrogen is substituted with a tert-butyl group, and the other with a propyl group. The benzimidazole is linked via a methylene bridge to a pyridin-2(1H)-one ring, which is further substituted with a propyl ester group. | 443987-05-1 | 5.7317 | 5.9483 | 5.8633 |
| G3-151  | A complex molecule with a central benzimidazole ring system. It features a propyl ester group and a 4-(2-fluorophenyl)butyl chain attached to the benzimidazole ring.                                                                                                                             | 443987-04-0 | 6.3788 | 6.2187 | 6.3501 |
| G1-152  | A complex molecule with a central benzimidazole ring system. It features a propyl ester group and a 4-(2-fluorophenyl)butyl chain. The pyridinone ring has a hydroxyl group (HO) at the 2-position.                                                                                               | 443986-99-0 | 7.7471 | 7.6304 | 7.8738 |
| G1-153  | A complex molecule with a central benzimidazole ring system. It features a propyl ester group and a 4-(2-fluorophenyl)butyl chain. The pyridinone ring has a hydroxyl group (HO) at the 2-position.                                                                                               | 443986-96-7 | 7.5100 | 7.5310 | 7.8171 |
| G1-154  | A complex molecule with a central benzimidazole ring system. It features a propyl ester group and a 4-(2-fluorophenyl)butyl chain. The pyridinone ring has a hydroxyl group (HO) at the 2-position.                                                                                               | 443986-94-5 | 7.9066 | 7.6229 | 7.9381 |
| G1-155  | A complex molecule with a central benzimidazole ring system. It features a propyl ester group and a 4-(2-fluorophenyl)butyl chain. The pyridinone ring has a hydroxyl group (HO) at the 2-position.                                                                                               | 443986-93-4 | 7.2660 | 7.5551 | 7.7376 |
| G1-156  | A complex molecule with a central benzimidazole ring system. It features a propyl ester group and a 4-(2-fluorophenyl)butyl chain. The pyridinone ring has a hydroxyl group (HO) at the 2-position.                                                                                               | 443986-91-2 | 7.9031 | 7.6198 | 7.9786 |

|        |                                                                                     |             |        |        |        |
|--------|-------------------------------------------------------------------------------------|-------------|--------|--------|--------|
| G1-157 | 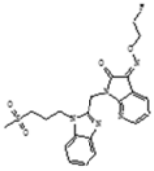   | 443986-85-4 | 7.5346 | 7.4212 | 7.4933 |
| G1-158 |    | 443986-84-3 | 7.5058 | 7.4216 | 7.5226 |
| G1-159 |    | 443986-83-2 | 8.1367 | 8.0295 | 8.1325 |
| G1-160 |   | 443986-82-1 | 7.3655 | 7.4100 | 7.4475 |
| G1-161 |  | 443986-81-0 | 7.0980 | 7.1129 | 6.9815 |
| G1-162 |  | 443986-80-9 | 7.3036 | 7.2556 | 7.4774 |
| G1-163 |  | 443986-78-5 | 7.0325 | 7.1163 | 7.2751 |

|         |                                                                                     |             |        |        |        |
|---------|-------------------------------------------------------------------------------------|-------------|--------|--------|--------|
| G1-164  | 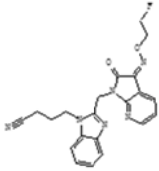   | 443986-77-4 | 7.2418 | 7.3672 | 7.3564 |
| G1-165  |    | 443986-76-3 | 6.9508 | 6.9553 | 7.4274 |
| G1-166* |    | 443986-75-2 | 7.6440 | 7.4963 | 7.7432 |
| G1-167* |   | 443986-71-8 | 4.9922 | 5.0407 | 4.7678 |
| G1-168  |  | 443986-70-7 | 4.9749 | 5.1087 | 4.5344 |
| G1-169* |  | 443986-40-1 | 7.2924 | 7.4514 | 7.6497 |
| G1-170* |  | 443986-39-8 | 7.1805 | 7.2874 | 7.5792 |

|         |                                                                                     |             |        |        |        |
|---------|-------------------------------------------------------------------------------------|-------------|--------|--------|--------|
| G1-171  | 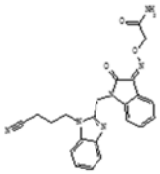   | 443986-38-7 | 7.3468 | 7.4858 | 7.2193 |
| G1-172  |    | 443986-35-4 | 7.5229 | 7.4733 | 7.4197 |
| G1-173* |    | 443986-33-2 | 7.3010 | 7.3116 | 7.2327 |
| G1-174  |   | 443986-30-9 | 6.6162 | 6.6848 | 6.5086 |
| G1-175  |  | 443986-29-6 | 7.1805 | 7.1901 | 7.1607 |
| G1-176  |  | 443986-28-5 | 6.8125 | 6.6797 | 6.7510 |
| G1-177  |  | 443986-23-0 | 7.7825 | 7.9118 | 7.7001 |



|        |  |             |        |        |        |
|--------|--|-------------|--------|--------|--------|
| G1-178 |  | 443986-22-9 | 7.6383 | 7.4658 | 7.4717 |
| G1-179 |  | 443986-20-7 | 5.9469 | 5.9630 | 6.2163 |
| G1-180 |  | 443986-19-4 | 7.9208 | 8.0308 | 8.0360 |
| G1-181 |  | 443986-15-0 | 7.6383 | 7.7728 | 7.5344 |
| G1-182 |  | 443986-08-1 | 6.6946 | 6.6250 | 6.6454 |
| G1-183 |  | 443986-07-0 | 6.4260 | 6.3651 | 6.6107 |
| G1-184 |  | 443986-05-8 | 7.0605 | 7.2311 | 7.2095 |

|         |                                                                                     |             |        |        |        |
|---------|-------------------------------------------------------------------------------------|-------------|--------|--------|--------|
| G1-185  | 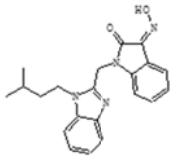   | 443986-04-7 | 8.0000 | 8.0455 | 7.5576 |
| G3-186  |    | 443985-86-2 | 7.0132 | 7.1859 | 7.0583 |
| G3-187  |    | 443985-85-1 | 6.7852 | 6.5615 | 6.9803 |
| G3-188  |   | 443985-82-8 | 7.7212 | 7.4593 | 7.8902 |
| G3-189* |  | 443985-80-6 | 6.4214 | 6.4250 | 6.4841 |
| G3-190  |  | 443985-79-3 | 6.9586 | 6.8908 | 6.9148 |
| G3-191  |  | 443985-78-2 | 6.6882 | 6.7500 | 6.6649 |

|         |                                                                                     |             |        |        |        |
|---------|-------------------------------------------------------------------------------------|-------------|--------|--------|--------|
| G3-192  | 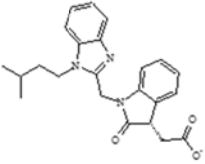   | 443985-77-1 | 6.1518 | 6.1026 | 6.2727 |
| G3-193* |    | 443985-76-0 | 7.4948 | 7.2612 | 7.6503 |
| G3-194* |    | 443985-74-8 | 6.6383 | 6.9948 | 5.9464 |
| G2-195  |   | 406944-77-2 | 6.7144 | 6.3843 | 6.5188 |
| G2-196* |  | 406944-75-0 | 6.7471 | 6.3261 | 6.2753 |
| G2-197  |  | 406944-73-8 | 5.5935 | 5.6564 | 5.2523 |
| G2-198  |  | 406944-70-5 | 7.2441 | 7.2010 | 6.8546 |

|         |                                                                                     |             |        |        |        |
|---------|-------------------------------------------------------------------------------------|-------------|--------|--------|--------|
| G2-199  | 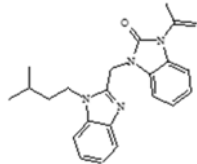   | 406940-52-1 | 8.3979 | 8.2568 | 7.9406 |
| G2-200  |    | 928164-16-3 | 7.1871 | 6.9642 | 7.3041 |
| G2-205  |    | 406942-50-5 | 8.3010 | 8.2653 | 8.0175 |
| G2-206  |   | 380604-55-7 | 7.7696 | 7.5222 | 7.8324 |
| G2-212* |  | 380604-26-2 | 7.2924 | 7.5672 | 7.4348 |
| G2-213  |  | 380604-25-1 | 8.2218 | 7.9770 | 7.9818 |
| G2-214  |  | 380604-23-9 | 7.8239 | 7.3315 | 8.3220 |

|         |                                                                                     |             |        |        |        |
|---------|-------------------------------------------------------------------------------------|-------------|--------|--------|--------|
| G2-215  | 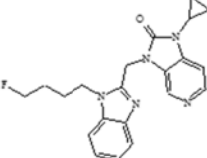   | 380604-21-7 | 8.0000 | 7.7313 | 7.4693 |
| G2-216* |    | 380604-10-4 | 7.6778 | 7.2297 | 7.5443 |
| G2-217  |    | 380604-02-4 | 6.6861 | 6.6212 | 6.7424 |
| G2-218  |   | 380604-00-2 | 7.9586 | 7.8253 | 8.3535 |
| G2-219  |  | 380603-98-5 | 8.2218 | 8.4693 | 8.4820 |
| G2-220  |  | 380603-86-1 | 7.8239 | 7.7603 | 8.1157 |
| G2-221  |  | 380603-79-2 | 7.7959 | 7.9515 | 7.6418 |

|         |  |             |        |        |        |
|---------|--|-------------|--------|--------|--------|
| G2-222  |  | 380603-57-6 | 8.0969 | 8.0563 | 8.1364 |
| G2-223  |  | 380603-55-4 | 8.1549 | 7.9633 | 8.1695 |
| G2-224* |  | 380603-45-2 | 7.4318 | 7.2945 | 7.5456 |
| G2-225  |  | 380603-32-7 | 6.5143 | 6.4865 | 6.1597 |
| G2-226  |  | 380603-27-0 | 8.0969 | 7.9867 | 8.4777 |
| G2-227* |  | 380603-22-5 | 6.9245 | 7.0565 | 6.6121 |
| G2-228  |  | 380603-19-0 | 7.8697 | 8.2063 | 8.1766 |
| G2-229  |  | 380603-16-7 | 7.6778 | 7.6650 | 7.3947 |

|         |                                                                                     |             |        |        |        |
|---------|-------------------------------------------------------------------------------------|-------------|--------|--------|--------|
| G2-230  | 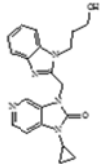   | 380603-10-1 | 7.3665 | 7.3422 | 7.1020 |
| G2-232  |    | 380602-63-1 | 8.5229 | 8.2046 | 8.0551 |
| G2-233  |    | 380602-60-8 | 7.8239 | 7.9638 | 7.9570 |
| G2-234  |   | 380602-59-5 | 8.3010 | 8.2436 | 8.3723 |
| G2-236* |  | 380602-55-1 | 7.5229 | 7.3713 | 7.6157 |
| G2-237  |  | 380602-54-0 | 8.5229 | 8.4141 | 8.3353 |
| G2-238  |  | 380602-53-9 | 8.0000 | 7.9942 | 7.8698 |

|         |                                                                                                                                                                                                                                                                                                      |             |        |        |        |
|---------|------------------------------------------------------------------------------------------------------------------------------------------------------------------------------------------------------------------------------------------------------------------------------------------------------|-------------|--------|--------|--------|
| G2-239* | A complex heterocyclic molecule featuring a central benzimidazole core. It has a 4-cyanophenyl group attached to one nitrogen, a 2-(4-methyl-1H-imidazol-5-yl)ethyl group attached to the other nitrogen, and a 2-phenylethyl group attached to the 2-position of the benzimidazole ring.            | 380602-52-8 | 8.3979 | 8.0150 | 8.1401 |
| G2-240  | A complex heterocyclic molecule similar to G2-239*, but with a 2-(4-methyl-1H-imidazol-5-yl)ethyl group instead of a 2-phenylethyl group.                                                                                                                                                            | 380602-51-7 | 8.2218 | 8.4524 | 8.1001 |
| G2-241  | A complex heterocyclic molecule similar to G2-239*, but with a 4-(methylsulfonyl)phenyl group instead of a 2-phenylethyl group.                                                                                                                                                                      | 380602-35-7 | 7.1249 | 7.2302 | 7.4416 |
| G2-242* | A complex heterocyclic molecule similar to G2-239*, but with a 4-ethynylphenyl group instead of a 2-phenylethyl group.                                                                                                                                                                               | 380602-34-6 | 6.2062 | 6.3480 | 6.3619 |
| G2-243  | A complex heterocyclic molecule featuring a central benzimidazole core. It has a 2-(4-methyl-1H-imidazol-5-yl)ethyl group attached to one nitrogen, a 2-(2-hydroxyethyl)phenyl group attached to the other nitrogen, and a 2-phenylethyl group attached to the 2-position of the benzimidazole ring. | 380602-33-5 | 6.6253 | 6.7043 | 6.8455 |
| G2-244  | A complex heterocyclic molecule similar to G2-239*, but with a 2-phenylethyl group instead of a 2-(4-methyl-1H-imidazol-5-yl)ethyl group.                                                                                                                                                            | 380602-31-3 | 5.2434 | 5.0109 | 5.2084 |
| G2-245  | A complex heterocyclic molecule similar to G2-239*, but with a 2-(4-methyl-1H-imidazol-5-yl)ethyl group instead of a 2-phenylethyl group.                                                                                                                                                            | 380602-28-8 | 6.6946 | 6.7663 | 6.7109 |



|         |                                                                                     |             |        |        |        |
|---------|-------------------------------------------------------------------------------------|-------------|--------|--------|--------|
| G2-248  | 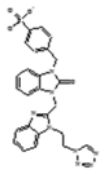   | 880550-47-0 | 6.4342 | 6.4988 | 6.5548 |
| G2-249  |    | 880550-46-9 | 7.8861 | 8.0408 | 7.7675 |
| G2-250  |    | 880550-45-8 | 6.8097 | 6.7889 | 7.0977 |
| G2-251  |   | 880550-44-7 | 6.4776 | 6.3759 | 6.6596 |
| G2-252  |  | 880550-43-6 | 6.9431 | 6.8895 | 6.6962 |
| G2-253* |  | 880550-42-5 | 5.0738 | 5.1317 | 5.5766 |
| G2-254  |  | 880550-41-4 | 8.5229 | 8.3743 | 8.4644 |

|         |                                                                                     |             |        |        |        |
|---------|-------------------------------------------------------------------------------------|-------------|--------|--------|--------|
| G2-255  | 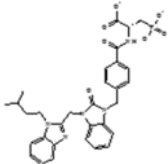   | 880550-40-3 | 7.4685 | 7.5401 | 7.7183 |
| G2-256  |    | 880550-39-0 | 8.1549 | 8.1639 | 7.9712 |
| G2-257  |    | 880550-38-9 | 7.2924 | 7.4157 | 7.1191 |
| G2-258* |   | 880550-37-8 | 7.3188 | 7.2304 | 7.6679 |
| G2-259  |  | 880550-36-7 | 7.5686 | 7.5407 | 7.4776 |
| G2-260  |  | 880550-35-6 | 7.2840 | 7.4040 | 7.2676 |
| G2-261  |  | 880550-34-5 | 7.4202 | 7.4295 | 7.4274 |

|         |  |             |        |        |        |
|---------|--|-------------|--------|--------|--------|
| G2-262  |  | 880550-33-4 | 7.8861 | 7.8953 | 8.3039 |
| G2-263  |  | 880550-32-3 | 6.6289 | 7.0212 | 6.5866 |
| G2-264  |  | 880550-31-2 | 6.3010 | 6.2740 | 6.1939 |
| G2-265* |  | 880550-30-1 | 5.9158 | 6.0213 | 5.8942 |
| G2-266  |  | 880550-29-8 | 6.2125 | 6.5345 | 5.4260 |
| G2-267  |  | 880550-28-7 | 7.8239 | 7.5358 | 7.6140 |
| G2-268  |  | 880550-27-6 | 6.7878 | 6.7625 | 6.8163 |

|         |                                                                                     |             |        |        |        |
|---------|-------------------------------------------------------------------------------------|-------------|--------|--------|--------|
| G2-269  | 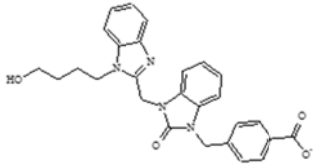   | 792899-80-0 | 8.3979 | 8.0936 | 8.4428 |
| G2-270  |    | 777846-71-6 | 6.8962 | 7.0364 | 6.9811 |
| G2-271  |    | 769112-50-7 | 8.0000 | 7.9514 | 7.5618 |
| G2-272  |    | 767280-09-1 | 8.1549 | 7.9130 | 8.0635 |
| G2-273  |  | 755746-27-1 | 7.9586 | 7.8903 | 7.6748 |
| G2-274* |  | 750563-87-2 | 8.0969 | 8.0031 | 8.0089 |
| G2-276  |  | 724420-50-2 | 7.2007 | 7.1996 | 6.9591 |
| G2-277* |  | 688736-16-5 | 7.8539 | 7.8772 | 8.4553 |

|        |                                                                                     |             |        |        |        |
|--------|-------------------------------------------------------------------------------------|-------------|--------|--------|--------|
| G2-278 | 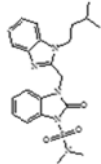   | 682755-77-7 | 7.2076 | 7.4273 | 7.0991 |
| G2-279 |    | 682755-75-5 | 7.1871 | 6.9496 | 7.1415 |
| G2-280 |    | 682755-73-3 | 8.1549 | 8.3981 | 7.6490 |
| G2-281 |   | 682755-71-1 | 6.1487 | 6.0042 | 6.3438 |
| G2-282 |  | 682755-63-1 | 7.1487 | 7.3246 | 7.3185 |
| G2-283 |  | 682755-59-5 | 7.6021 | 7.5059 | 7.4675 |
| G2-284 |  | 682755-57-3 | 8.3010 | 8.3613 | 8.2790 |

|         |                                                                                     |             |        |        |        |
|---------|-------------------------------------------------------------------------------------|-------------|--------|--------|--------|
| G2-285  | 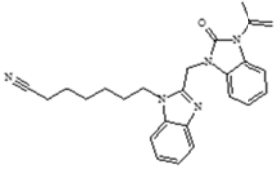   | 682755-55-1 | 8.2218 | 8.0403 | 8.0790 |
| G2-286* |    | 682755-53-9 | 7.8861 | 8.0527 | 7.7739 |
| G2-287  |    | 682755-51-7 | 7.5686 | 7.2953 | 7.7504 |
| G2-288  |   | 682755-40-4 | 6.9431 | 7.2151 | 6.9164 |
| G2-289* |  | 682755-02-8 | 7.4202 | 7.2333 | 7.0473 |
| G2-290  |  | 682754-99-0 | 6.1637 | 6.4011 | 6.7394 |
| G2-291  |  | 682754-96-7 | 8.3979 | 8.3494 | 8.4518 |

|        |                                                                                     |             |        |        |        |
|--------|-------------------------------------------------------------------------------------|-------------|--------|--------|--------|
| G2-292 | 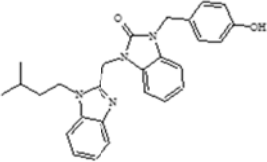   | 682754-93-4 | 7.7447 | 7.6885 | 8.0926 |
| G2-293 |    | 682754-87-6 | 7.3979 | 7.6563 | 7.2514 |
| G2-294 |    | 682754-84-3 | 7.5528 | 7.6882 | 7.7397 |
| G2-295 |   | 682754-81-0 | 7.7959 | 7.9428 | 7.4316 |
| G2-296 |  | 406944-83-0 | 6.1249 | 6.3277 | 6.2251 |
| G2-297 |  | 406944-48-7 | 6.6402 | 6.7253 | 6.9595 |
| G2-298 |  | 406944-42-1 | 5.7144 | 5.6872 | 5.4458 |

|         |                                                                                     |             |        |        |        |
|---------|-------------------------------------------------------------------------------------|-------------|--------|--------|--------|
| G2-299  | 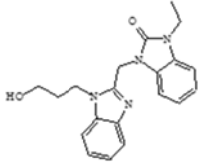   | 406944-40-9 | 8.0000 | 7.6325 | 7.7468 |
| G2-300* |    | 406944-39-6 | 7.7447 | 7.4651 | 7.6569 |
| G2-301  |    | 406944-37-4 | 7.8539 | 7.6865 | 7.8925 |
| G2-302  |   | 406944-36-3 | 7.6778 | 7.1992 | 7.7475 |
| G2-303  |  | 406944-27-2 | 7.0362 | 6.8508 | 7.1645 |
| G2-304* |  | 406944-25-0 | 5.8271 | 5.6133 | 5.8193 |
| G2-305  |  | 406944-22-7 | 7.5229 | 7.5729 | 7.7578 |



|         |                                                                                     |             |        |        |        |
|---------|-------------------------------------------------------------------------------------|-------------|--------|--------|--------|
| G2-306  | 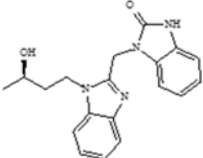   | 406944-10-3 | 6.3809 | 6.3045 | 6.6018 |
| G2-307  |    | 406944-09-0 | 7.5528 | 7.4656 | 7.6806 |
| G2-308* |    | 406944-05-6 | 7.2441 | 7.2193 | 6.9986 |
| G2-309  |   | 406944-01-2 | 7.2757 | 7.0268 | 7.2244 |
| G2-310  |  | 406943-97-3 | 6.7620 | 6.7611 | 6.6927 |
| G2-311  |  | 406943-96-2 | 7.9586 | 7.6619 | 7.9142 |
| G2-312  |  | 406943-95-1 | 8.3979 | 8.2780 | 8.1736 |

|         |                                                                                     |             |        |        |        |
|---------|-------------------------------------------------------------------------------------|-------------|--------|--------|--------|
| G2-313  | 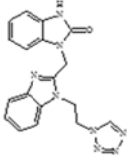   | 406943-84-8 | 5.9223 | 6.1474 | 6.3973 |
| G2-314  |    | 406943-32-6 | 7.7212 | 7.6192 | 7.3257 |
| G2-316  |    | 406943-23-5 | 7.6778 | 7.5575 | 8.0865 |
| G2-317* |   | 406943-21-3 | 8.3010 | 8.0140 | 7.1719 |
| G2-318  |  | 406943-20-2 | 8.0969 | 7.9262 | 7.5989 |
| G2-319* |  | 406943-16-6 | 6.5258 | 6.4333 | 6.0490 |
| G2-320  |  | 406943-07-5 | 7.4318 | 7.3194 | 7.6095 |

|         |                                                                                     |             |        |        |        |
|---------|-------------------------------------------------------------------------------------|-------------|--------|--------|--------|
| G2-321  | 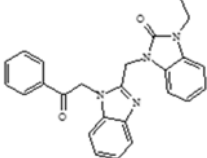   | 406943-05-3 | 6.9508 | 6.9215 | 6.6647 |
| G2-322  |    | 406942-99-2 | 5.7786 | 6.1191 | 5.5992 |
| G2-323  |    | 406942-98-1 | 7.1249 | 6.6986 | 7.2639 |
| G2-324* |   | 406942-73-2 | 7.8539 | 7.6354 | 7.4643 |
| G2-325  |  | 406942-72-1 | 7.2076 | 6.9047 | 6.9431 |
| G2-326  |  | 406942-71-0 | 7.9586 | 8.0928 | 7.8874 |
| G2-327  |  | 406942-69-6 | 6.7190 | 6.5973 | 6.9841 |

|         |                                                                                     |             |        |        |        |
|---------|-------------------------------------------------------------------------------------|-------------|--------|--------|--------|
| G2-328  | 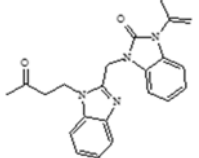   | 406942-68-5 | 8.3010 | 8.3698 | 8.2921 |
| G2-329  |    | 406942-51-6 | 7.8539 | 7.7106 | 7.5260 |
| G2-331  |    | 406941-92-2 | 5.9970 | 6.1100 | 6.4835 |
| G2-332  |   | 406941-91-1 | 7.8239 | 7.9149 | 8.1584 |
| G2-333  |  | 406941-90-0 | 6.2269 | 6.3821 | 6.0873 |
| G2-334* |  | 406941-89-7 | 5.0738 | 5.1340 | 5.1399 |
| G2-335  |  | 406941-88-6 | 7.0044 | 7.2208 | 6.7888 |

|         |                                                                                     |             |        |        |        |
|---------|-------------------------------------------------------------------------------------|-------------|--------|--------|--------|
| G2-336  | 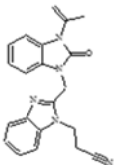   | 406941-87-5 | 7.8239 | 7.8592 | 7.4385 |
| G2-337  |    | 406941-82-0 | 7.3010 | 7.4335 | 7.2861 |
| G2-338* |    | 406941-75-1 | 7.0655 | 6.6516 | 7.0629 |
| G2-339  |   | 406941-74-0 | 7.3872 | 7.5709 | 7.1532 |
| G2-340  |  | 406941-73-9 | 7.2840 | 7.6446 | 7.3698 |
| G2-341  |  | 406941-27-3 | 7.8239 | 7.7272 | 7.6058 |
| G2-342  |  | 406941-26-2 | 8.0969 | 8.2544 | 7.9404 |

|         |                                                                                                                                                                                                                                                                                                                      |             |        |        |        |
|---------|----------------------------------------------------------------------------------------------------------------------------------------------------------------------------------------------------------------------------------------------------------------------------------------------------------------------|-------------|--------|--------|--------|
| G2-343* | A complex organic molecule featuring a central benzimidazole ring system. It has an isobutyl group on the left nitrogen, a 2-oxo-1,2-diphenylethan-1-yl group on the right nitrogen, and a 4-oxo-4-(3-oxopropyl)butanoate group at the 2-position.                                                                   | 406941-25-1 | 7.1249 | 7.1769 | 7.1704 |
| G2-344  | A complex organic molecule similar to G2-343*, but with a 2-oxo-1,2-diphenylethan-1-yl group at the 2-position instead of a butanoate derivative.                                                                                                                                                                    | 406941-20-6 | 6.1831 | 6.0223 | 6.3718 |
| G2-345  | A complex organic molecule with a central benzimidazole ring system, an isobutyl group on the left nitrogen, and a 2-oxo-1,2-diphenylethan-1-yl group on the right nitrogen. It also features a 2-oxo-1,2-diphenylethan-1-yl group at the 2-position.                                                                | 406941-15-9 | 8.2218 | 8.3546 | 8.0672 |
| G2-346  | A complex organic molecule with a central benzimidazole ring system. It has an isobutyl group on the left nitrogen, a 2-oxo-1,2-diphenylethan-1-yl group on the right nitrogen, and a 6-cyano-1-hexyl group at the 2-position.                                                                                       | 406941-00-2 | 7.6021 | 7.4315 | 7.6682 |
| G2-347  | A complex organic molecule with a central benzimidazole ring system. It has an isobutyl group on the left nitrogen, a 2-oxo-1,2-diphenylethan-1-yl group on the right nitrogen, and a 2-oxo-1,2-diphenylethan-1-yl group at the 2-position. It also features a 2-oxo-1,2-diphenylethan-1-yl group at the 2-position. | 406940-96-3 | 6.3979 | 6.5638 | 6.5030 |
| G2-348* | A complex organic molecule with a central benzimidazole ring system. It has an isobutyl group on the left nitrogen, a 2-oxo-1,2-diphenylethan-1-yl group on the right nitrogen, and a 2-oxo-1,2-diphenylethan-1-yl group at the 2-position. It also features a 2-oxo-1,2-diphenylethan-1-yl group at the 2-position. | 406940-95-2 | 6.5346 | 6.8861 | 7.0256 |
| G2-349  | A complex organic molecule with a central benzimidazole ring system. It has an isobutyl group on the left nitrogen, a 2-oxo-1,2-diphenylethan-1-yl group on the right nitrogen, and a 2-oxo-1,2-diphenylethan-1-yl group at the 2-position. It also features a 2-oxo-1,2-diphenylethan-1-yl group at the 2-position. | 406940-91-8 | 8.0458 | 7.8845 | 8.1090 |

|         |                                                                                     |             |        |        |        |
|---------|-------------------------------------------------------------------------------------|-------------|--------|--------|--------|
| G2-350  | 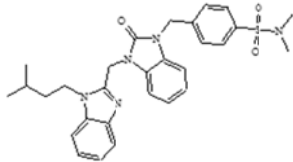   | 406940-90-7 | 8.3979 | 8.2360 | 8.2507 |
| G2-351  |    | 406940-88-3 | 7.9208 | 7.9457 | 8.0481 |
| G2-352  |    | 406940-77-0 | 7.8239 | 7.8237 | 7.9100 |
| G2-353  |   | 406940-76-9 | 7.4559 | 7.0688 | 7.2769 |
| G2-356  |  | 406940-56-5 | 7.9586 | 8.1317 | 8.0631 |
| G2-357* |  | 406940-54-3 | 7.2441 | 7.0369 | 7.1116 |
| G2-358  |  | 406940-53-2 | 7.9586 | 8.0197 | 7.4856 |

|         |                                                                                                                                                                                                   |             |        |        |        |
|---------|---------------------------------------------------------------------------------------------------------------------------------------------------------------------------------------------------|-------------|--------|--------|--------|
| G3-360* | The structure shows a benzimidazole ring system with a methyl group on the nitrogen and a 2-phenyl-1H-benzimidazol-5-ylmethyl group attached to the 2-position of the benzimidazole ring.         | 574732-09-5 | 4.3233 | 4.0925 | 4.8520 |
| G3-361  | The structure shows a benzimidazole ring system with a methyl group on the nitrogen and a 2-(1H-benzotriazol-4-ylmethyl)benzimidazole group attached to the 2-position of the benzimidazole ring. | 574732-08-4 | 4.2882 | 4.4274 | 4.4740 |
| G3-366  | The structure shows a benzimidazole ring system with a methyl group on the nitrogen and a 2-(1H-benzotriazol-4-ylmethyl)benzimidazole group attached to the 2-position of the benzimidazole ring. | 574731-93-4 | 4.8097 | 4.7256 | 5.3148 |
| G3-367  | The structure shows a benzimidazole ring system with a methyl group on the nitrogen and a 2-(1H-benzotriazol-4-ylmethyl)benzimidazole group attached to the 2-position of the benzimidazole ring. | 256366-13-9 | 5.5702 | 5.5378 | 5.7965 |
| G3-368  | The structure shows a benzimidazole ring system with a methyl group on the nitrogen and a 2-(1H-benzotriazol-4-ylmethyl)benzimidazole group attached to the 2-position of the benzimidazole ring. | 256366-07-1 | 6.3565 | 6.4078 | 6.6007 |
| G3-369  | The structure shows a benzimidazole ring system with a methyl group on the nitrogen and a 2-(1H-benzotriazol-4-ylmethyl)benzimidazole group attached to the 2-position of the benzimidazole ring. | 256366-06-0 | 5.9586 | 5.7527 | 5.8977 |
| G3-370  | The structure shows a benzimidazole ring system with a methyl group on the nitrogen and a 2-(1H-benzotriazol-4-ylmethyl)benzimidazole group attached to the 2-position of the benzimidazole ring. | 256366-05-9 | 5.5850 | 5.6077 | 5.3354 |



|         |                                                                                     |             |        |        |        |
|---------|-------------------------------------------------------------------------------------|-------------|--------|--------|--------|
| G3-371  | 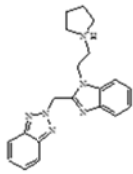   | 256366-04-8 | 6.3768 | 6.4864 | 6.4396 |
| G3-372  |    | 256366-03-7 | 6.5850 | 6.6053 | 6.2998 |
| G3-373  |    | 256366-02-6 | 6.2291 | 6.2270 | 6.1637 |
| G3-374* |   | 256366-01-5 | 5.6576 | 5.8714 | 5.7849 |
| G3-375  |  | 256366-00-4 | 6.1135 | 6.2197 | 6.3603 |
| G3-376  |  | 256365-98-7 | 4.9788 | 4.5203 | 5.1260 |
| G3-377  |  | 256365-95-4 | 4.7423 | 4.6408 | 4.6929 |

|         |                                                                                                                                                                                                                                 |             |        |        |        |
|---------|---------------------------------------------------------------------------------------------------------------------------------------------------------------------------------------------------------------------------------|-------------|--------|--------|--------|
| G3-378* | <p>The structure shows a central benzimidazole ring system. One nitrogen is substituted with a 2,2,4,4-tetramethyl-1,3-dioxane-5-carbonyl group. The other nitrogen is substituted with a 1H-benzotriazol-4-ylmethyl group.</p> | 256365-94-3 | 5.3655 | 5.4292 | 5.1005 |
| G3-379  | <p>The structure shows a central benzimidazole ring system. One nitrogen is substituted with a 2-aminoethyl group. The other nitrogen is substituted with a 1H-benzotriazol-4-ylmethyl group.</p>                               | 256365-93-2 | 5.6778 | 5.9557 | 5.4784 |
| G3-380  | <p>The structure shows a central benzimidazole ring system. One nitrogen is substituted with a 2-aminoethyl group. The other nitrogen is substituted with a 1H-benzotriazol-4-ylmethyl group.</p>                               | 256365-90-9 | 6.9208 | 6.6459 | 6.6588 |
| G3-381  | <p>The structure shows a central benzimidazole ring system. One nitrogen is substituted with a 2-aminoethyl group. The other nitrogen is substituted with a 1H-benzotriazol-4-ylmethyl group.</p>                               | 256365-89-6 | 6.2840 | 6.5546 | 6.4583 |
| G3-382* | <p>The structure shows a central benzimidazole ring system. One nitrogen is substituted with a 2-aminoethyl group. The other nitrogen is substituted with a 1H-benzotriazol-4-ylmethyl group.</p>                               | 256365-88-5 | 6.6778 | 7.0122 | 6.6567 |
| G3-383  | <p>The structure shows a central benzimidazole ring system. One nitrogen is substituted with a 2-aminoethyl group. The other nitrogen is substituted with a 1H-benzotriazol-4-ylmethyl group.</p>                               | 256365-86-3 | 5.4815 | 5.4113 | 5.5467 |
| G3-384  | <p>The structure shows a central benzimidazole ring system. One nitrogen is substituted with a 2-hydroxyethyl group. The other nitrogen is substituted with a 1H-benzotriazol-4-ylmethyl group.</p>                             | 256365-83-0 | 5.1135 | 5.3208 | 5.3247 |

|         |                                                                                     |             |        |        |        |
|---------|-------------------------------------------------------------------------------------|-------------|--------|--------|--------|
| G3-385  | 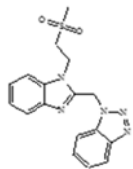   | 256365-78-3 | 6.6021 | 6.7447 | 6.8153 |
| G3-386* |    | 256365-77-2 | 6.3665 | 6.4973 | 6.3293 |
| G3-387  |    | 256365-76-1 | 6.5229 | 6.3333 | 6.8134 |
| G3-388  |   | 256365-74-9 | 6.7212 | 6.4671 | 6.6927 |
| G3-389  |  | 256365-72-7 | 7.0000 | 6.9225 | 6.7537 |
| G3-390  |  | 256365-71-6 | 7.1805 | 6.9695 | 6.6531 |
| G3-391  |  | 256365-70-5 | 6.0000 | 6.1495 | 6.0794 |

|         |  |             |        |        |        |
|---------|--|-------------|--------|--------|--------|
| G3-392  |  | 256365-69-2 | 5.1331 | 5.1499 | 5.1593 |
| G3-393  |  | 256365-68-1 | 5.5528 | 5.5456 | 5.5949 |
| G3-394* |  | 256365-67-0 | 5.9586 | 6.4371 | 5.6768 |
| G3-395  |  | 256365-66-9 | 6.2218 | 6.6841 | 6.5662 |
| G3-396  |  | 256365-62-5 | 5.1739 | 5.0185 | 5.2766 |
| G3-399  |  | 6075-17-8   | 6.3279 | 6.5549 | 6.7315 |
| G3-400* |  | 5914-83-0   | 6.6576 | 6.4458 | 6.2927 |

|         |                                                                                    |           |        |        |        |
|---------|------------------------------------------------------------------------------------|-----------|--------|--------|--------|
| G3-401  | 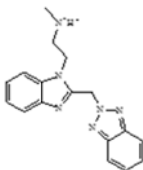  | 5823-63-2 | 6.7447 | 6.6509 | 6.2367 |
| G3-403* |   | 5823-61-0 | 5.9586 | 5.9402 | 5.7287 |
| G3-404  |   | 5823-60-9 | 6.8539 | 6.8284 | 6.8621 |
| G3-405  |  | 5823-54-1 | 4.5072 | 4.8298 | 4.6215 |

\* Test set

Table S2. Selected descriptors in the VS-RF classification

| Descriptor | Definition                                                                                    | Class                      |
|------------|-----------------------------------------------------------------------------------------------|----------------------------|
| D299       | The largest eigenvalue                                                                        | Eigenvalue-based indices   |
| D347       | Molecular topological path index of order 07                                                  | Walk and path counts       |
| D490       | Moran topological structure autocorrelation length-4 weighted by atomic van der Waals volumes | 2D autocorrelation         |
| D503       | Moran topological structure autocorrelation length-1 weighted by atomic polarizabilities      | 2D autocorrelation         |
| D513       | Molecular topological order-3 charge index                                                    | Topological charge indices |
| D528       | Mean molecular topological order-8 charge index                                               | Topological charge indices |
